# Supplementary material
Source: PubMed Central journal article supplement (PMC2265448)
Supplement: blood_blood-2007-10-118810_1.pdf [file blood_blood-2007-10-118810_1.pdf]

R. Mertens, Kinderklinik RWTH, Aachen  
A. Gnekow, Kinderklinik des KZVA, Augsburg  
G. Henze, Charité Campus Virchow-Klinikum, Berlin  
L. Schweigerer, Helios Klinikum, Berlin-Buch  
W. Andler/Th. Wiesel, Vestische Kinderklinik, Datteln  
D. Breu, Städt. Kliniken, Dortmund  
M. Suttorp/ I. Lauterbach, Universitäts-Kinderklinik Carl-Gustav-Carus, Dresden  
A. Borkhardt, Universitäts-Kinderklinik, Düsseldorf  
A. Sauerbrey, Helios Klinikum GmbH, Erfurt  
W. Holter, Universitäts-Kinderklinik, Erlangen  
B. Kremens, Universitäts-Kinderklinik, Essen  
Th. Klingebiel/Th. Lehrnbecher, Klinikum J. W. Goethe-Universität, Frankfurt  
C.M. Niemeyer, Universitäts-Kinderklinik Freiburg  
A. Reiter, Universitäts-Kinderklinik, Gießen  
M. Lakomek, Georg-August-Universität, Göttingen  
R. Schneppenheim/H. Kabisch, Universitätsklinikum, Hamburg-Eppendorf  
K. Welte, Med. Hochschule, Hannover  
A. E. Kulozik, Universitäts-Kinderklinik, Heidelberg  
N. Graf, Universitäts-Kinderklinik, Homburg/Saar  
M. Rodehüser, Städt. Kinderklinik, Kassel  
M. Schrappe/A. Claviez, Universitätsklinikum Schleswig-Holstein, Kiel  
F. Berthold, Universitäts-Kinderklinik, Köln  
W. Sternschulte, Städt. Kinderkrankenhaus Riehl, Köln  
S. Völpel, Städt. Krankenhäuser, Krefeld  
U. Bierbach, Universitäts-Kinderklinik, Leipzig  
S. Selle, Kinderklinik St. Anastift, Ludwigshafen  
P. Vorwerk/U. Kluba, Universitätskinderklinik, Magdeburg  
I. Schmid/U.Graubner, Kinderklinik und Poliklinik Dr. v. Haunerschen Kinderspital, München  
H. Jürgens, Universitäts-Kinderklinik, Münster  
W. Scheurlen/A. Jobke, Cnopf'sche Kinderklinik, Nürnberg  
H. Müller/R. Kolb, Klinikum Oldenburg gGmbH, Oldenburg  
N. Albers, Kinderspital, Osnabrück  
F.J. Helmig/O. Peters, Klinik St. Hedwig, Regensburg  
St. Bielack, Olgahospital, Stuttgart  
R. Handgretinger/H. Scheel-Walter, Universitäts-Kinderklinik, Tübingen  
K.-M. Debatin, Universitäts-Kinderklinik, Ulm  
P.-G. Schlegel/St. Rutkowski, Universitäts-Kinderklinik, Würzburg  
H. Gadner/M. Dworzak, Zentrum für Kinder- u. Jugendheilkunde im St. Anna Kinderspital,  
Wien
