# Supplementary material
Source: PubMed Central journal article supplement (PMC2265448)
Supplement: blood_blood-2007-10-118810_2.pdf [file blood_blood-2007-10-118810_2.pdf]

| <b>Patient</b> | <b>TL</b>            | <b>AML</b>                                              |
|----------------|----------------------|---------------------------------------------------------|
| <b>1</b>       | 21c                  | 21c                                                     |
| <b>2</b>       | 21c                  | +11, 21c                                                |
| <b>3</b>       | der(11)(q23),<br>21c | complex (47 XX, t(4;7),-<br>5,+21, 21c                  |
| <b>4</b>       | 21c                  | del(1q), 21c                                            |
| <b>5</b>       | complex, 21c         | 21c                                                     |
| <b>6</b>       | 21c                  | der(3q), 21c                                            |
| <b>7</b>       | 21c                  | trisomy 19, 21c                                         |
| <b>8</b>       | del(9), 21c          | complex (50-56 XY,<br>+19,+21,+2,+3,+6,+13,+14),<br>21c |
| <b>9</b>       | 21c                  | 21c                                                     |
